# Supplementary material
Source: Springer Nature journal article supplement (https://www.springermedizin.de/resource/supplementary/12889_2013_6423_MOESM1_ESM.pdf/9498008)
Supplement: MOESM1 [file 9498008]

SERVICE DELIVERY

HEALTH WORKFORCE

INFORMATION

MEDICAL PRODUCTS, VACCINES & TECHNOLOGIES

FINANCING

LEADERSHIP / GOVERNANCE

ACCESS  
COVERAGE

QUALITY  
SAFETY

IMPROVED HEALTH (LEVEL AND EQUITY)

RESPONSIVENESS

SOCIAL AND FINANCIAL RISK PROTECTION

IMPROVED EFFICIENCY

## References

1. World Health Organization. Everybody's business: strengthening health systems to improve health outcomes. WHO's Framework for Action. Geneva: World Health Organization. [http://www.who.int/healthsystems/strategy/everybodys\\_businesspdf](http://www.who.int/healthsystems/strategy/everybodys_businesspdf). 2007.
